# Supplementary material
Source: ML conference proceedings conference paper supplement (https://www.ecva.net/papers/eccv_2020/papers_ECCV/html/123750018_ECCV_2020_paper.php)
Supplement: Supplementary file 1 [file 123750018-supp.pdf]

## A Experiments Results

We further show some action samples on both the Human-3.6m dataset [16] and the NTU RGB+D dataset [29]. We sample one frame in terms of every two consecutive frames to show the whole sequence of actions.

*Human-3.6m* We show ten classes of action sequences: *direction*, *discussion*, *eating*, *greeting*, *phoning*, *posing*, *sitting*, *sitting down*, *smoking* and *walking* in Fig. 10, Fig. 11, Fig. 12, Fig. 13, Fig. 14, Fig. 15, Fig. 16, Fig. 17, Fig. 18 and Fig. 19 on Human-3.6m dataset. For each action class, we present three generated action sequences from random initialization.

*NTU RGB+D* We show ten classes of action sequences: *drinking water*, *jumping up*, *kicking something*, *making phone call*, *sitting down*, *standing up*, *throwing*, *hand waving*, *wearing jacket* and *crossing hand in front* in Fig. 20, Fig. 21, Fig. 22, Fig. 23, Fig. 24, Fig. 25, Fig. 26, Fig. 27, Fig. 28 and Fig. 29 on NTU RGB+D dataset. For each action class, we present two generated action sequences (the top two lines) for *cross-view* and two generated action sequences (the bottom two lines) for *cross-subject* from random initialization.

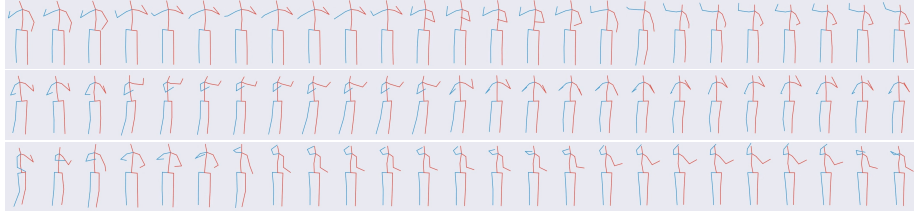

Fig. 10: *direction*: this character is directing traffic.

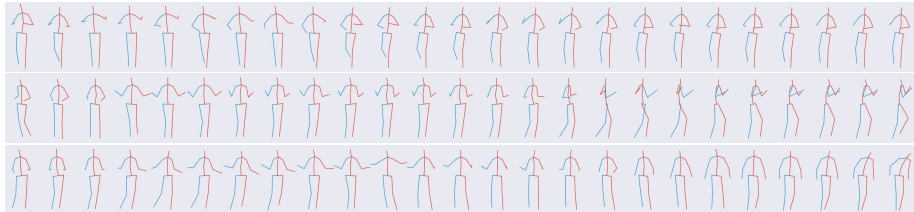

Fig. 11: *discussion*: this character is discussing issues with others.

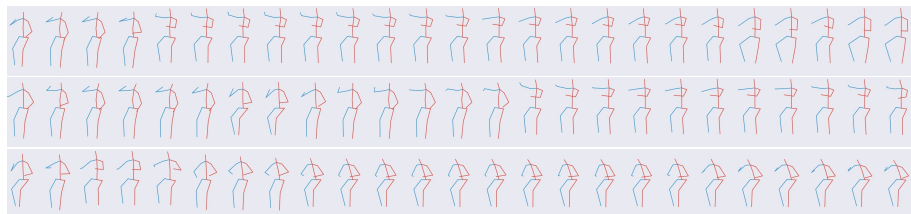

Fig. 12: *eating*: this character is sitting on the chair and having its lunch.

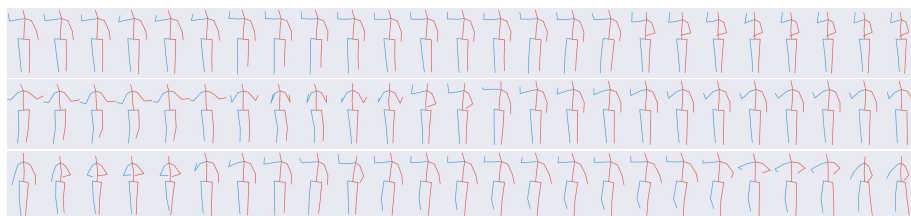

Fig. 13: *greeting*: this character is waving hands and greeting with other people.

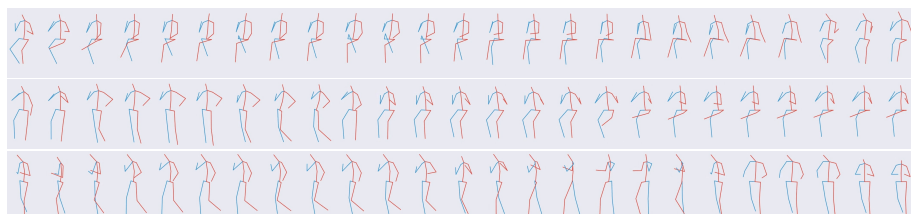

Fig. 14: *phoning*: this character is making a phone call with other people.

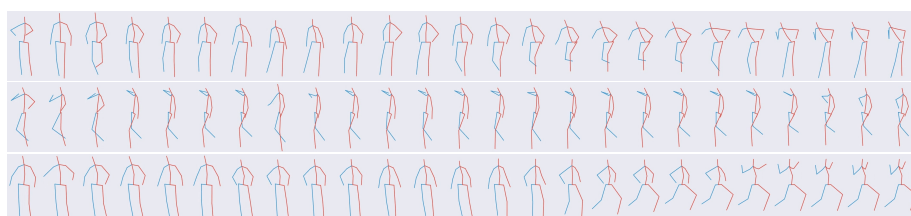

Fig. 15: *posing*: this character is making some exaggerated poses to take photos.

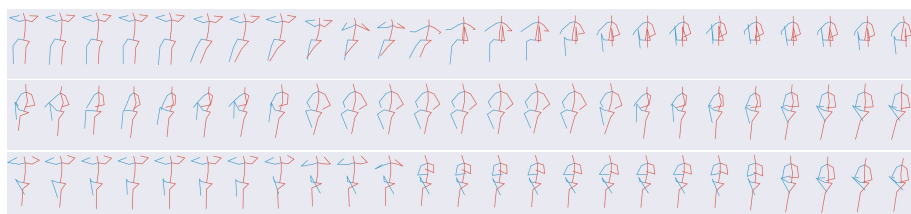

Fig. 16: *sitting*: this character is sitting down on a chair.

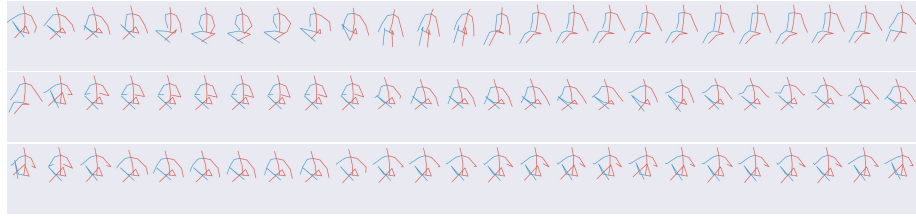

Fig. 17: *sitting down*: this character is sitting down on the ground.

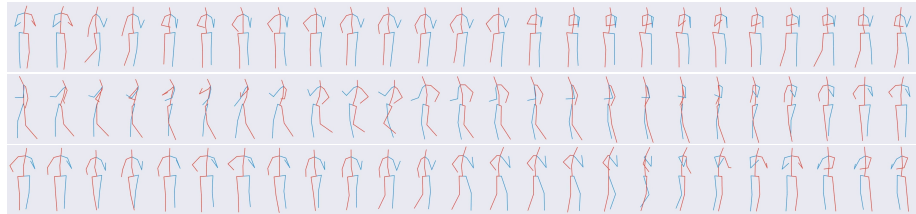

Fig. 18: *smoking*: this character is holding a cigarette in one hand and occasionally smokes.

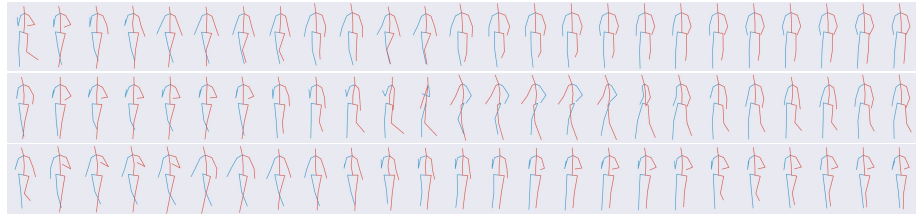

Fig. 19: *walking*: this character is walking.

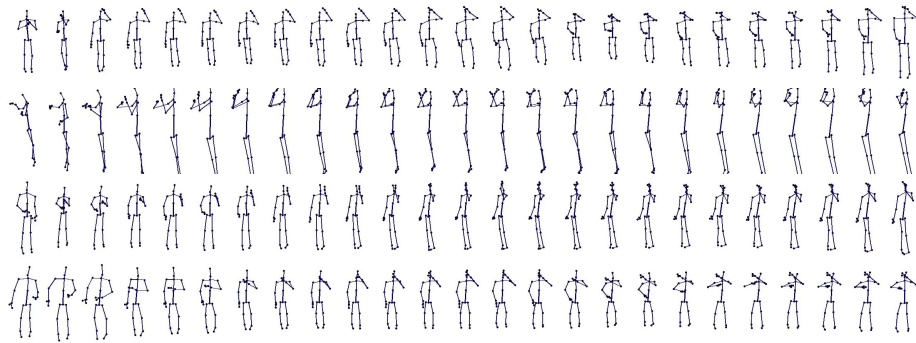

Fig. 20: *drinking water*: this character is holding a water bottle in one hand while drinking water.

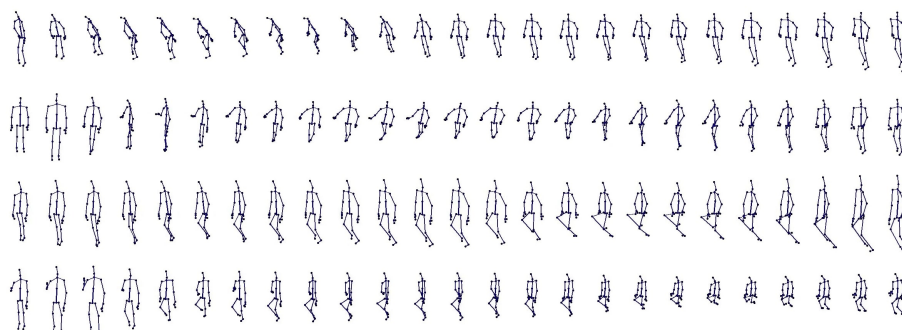

Fig. 21: *jumping up*: this character is jumping.

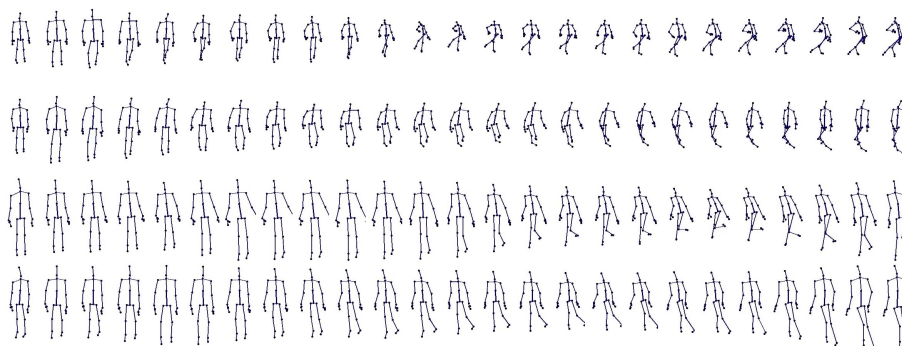

Fig. 22: *kicking something*: this character is kicking something.

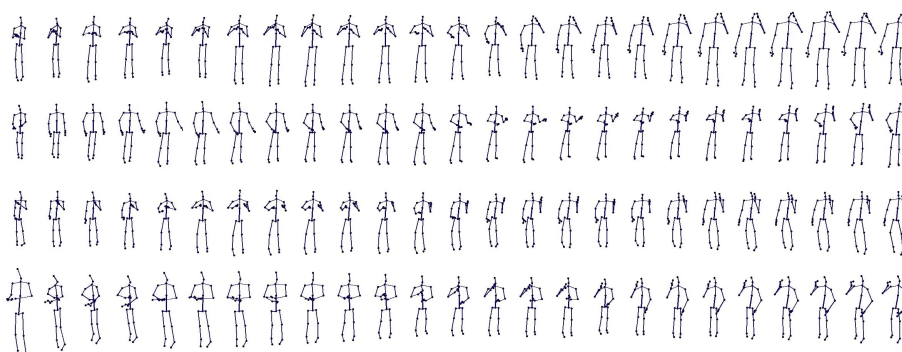

Fig. 23: *making phone call*: this character is raising his mobile phone with one hand and is making a phone call.

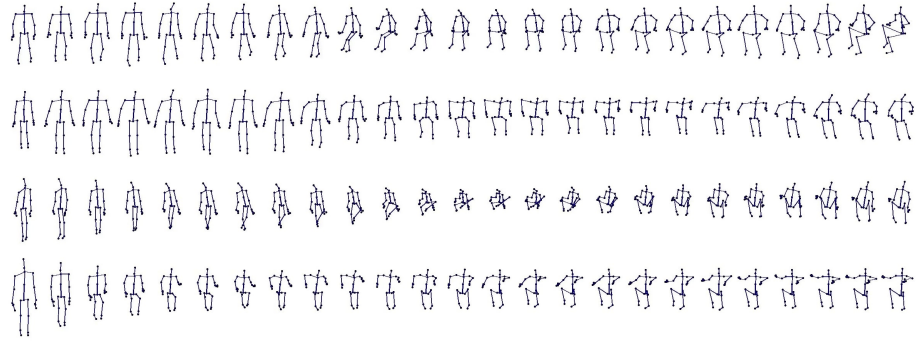

Fig. 24: *sitting down*: this character is sitting down.

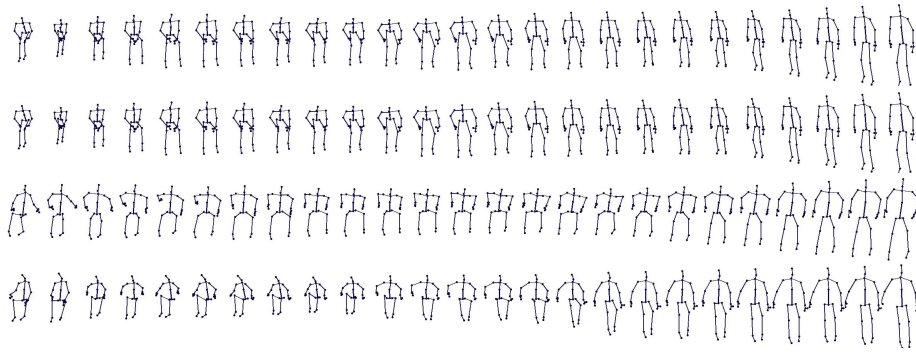

Fig. 25: *standing up*: this character is standing up.

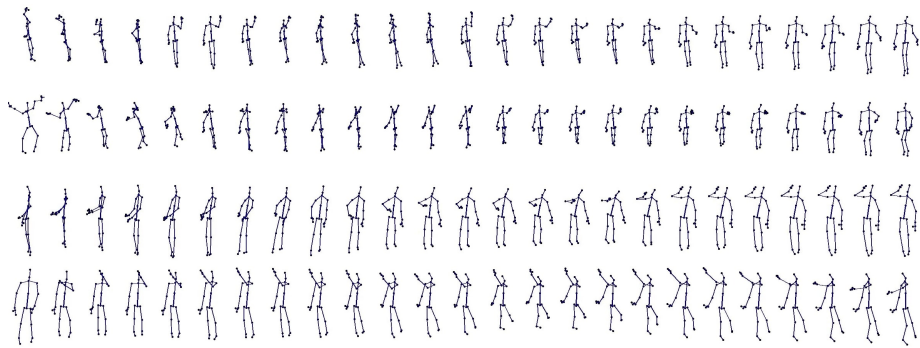

Fig. 26: *throwing*: this character is throwing a ball.



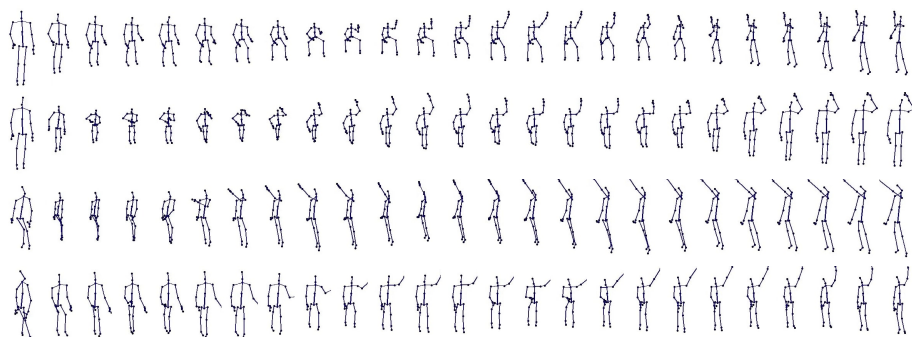

Fig. 27: *hand waving*: this character is waving hands.

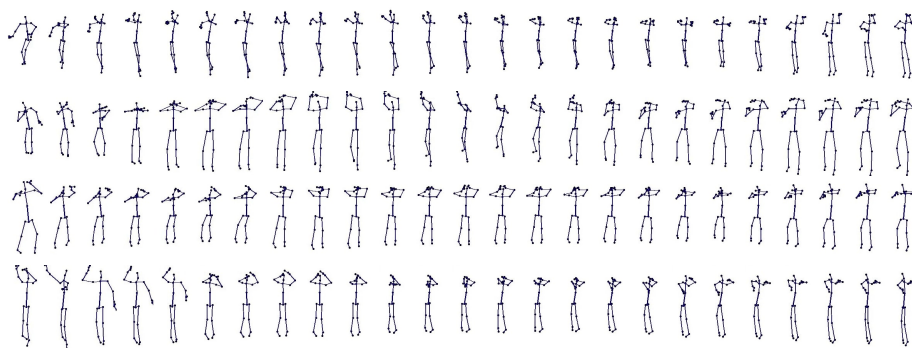

Fig. 28: *wearing jacket*: this character is wearing jacket with its two arms.

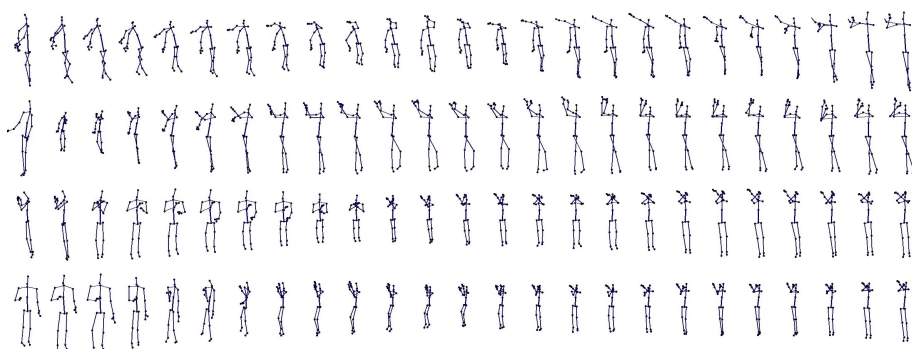

Fig. 29: *crossing hand in front*: the final position for this action is making this character's arm crossing in front.
